# Supplementary material for: Ambiguity in Determining Financial Capability of SSI and SSDI Beneficiaries With Psychiatric Disabilities
Source: Atypon-hosted journal article supplement (doi:10.1176/appi.ps.201400036), 2014-12-17

## Supplementary Tables and Figure

Table 1: Inter-Rater Reliability of Final Capability Determination

|            |             | Assessor 2  |         |       |       |                   |
|------------|-------------|-------------|---------|-------|-------|-------------------|
|            |             | Not Capable | Capable | Total | Kappa | Percent Agreement |
| Assessor 1 | Not Capable | 22          | 2       | 24    | .770  | 88.6              |
|            | Capable     | 3           | 17      | 20    |       |                   |
|            | Total       | 25          | 19      | 44    |       |                   |

Table 2: Capable vs. Incapable Participants

|                                                              | Incapable | Capable | Correlation <sup>a</sup> |
|--------------------------------------------------------------|-----------|---------|--------------------------|
| Money Mismanagement measure (mean)                           | 9.4       | 4.7     | .464** <sup>Ⓟ</sup>      |
| Beck Depression Inventory (mean)                             | 26.4      | 20.5    | .242** <sup>Ⓟ</sup>      |
| No. days homeless in past 60 days (mean rank)                | 62.8      | 56.4    | .180* <sup>ⓅⓈ</sup>      |
| No. times hospitalized for psychological problem (mean rank) | 65.9      | 53.5    | .182* <sup>ⓅⓈ</sup>      |

\* p≤.05, \*\* p≤.01

<sup>a</sup> In our analysis, incapable was defined as 1 and capable was defined as 0, so a positive correlation coefficient indicates greater association with being incapable.<sup>Ⓟ</sup> Pearson's r<sup>Ⓢ</sup> Spearman's rho

Table 3: Demographics and Clinical Characteristics

|                                   | Incapable (n=57) | Capable (n=61) |
|-----------------------------------|------------------|----------------|
| Age (mean)                        | 44.3             | 47.4           |
| Gender                            |                  |                |
| Male                              | 26               | 24             |
| Female                            | 31               | 36             |
| Ethnicity                         |                  |                |
| White                             | 32               | 36             |
| Black                             | 16               | 15             |
| Hispanic                          | 8                | 9              |
| Other                             | 1                | 1              |
| Marital status                    |                  |                |
| Not married                       | 51               | 54             |
| Married                           | 5                | 5              |
| Years education (mean)            | 12.1             | 11.9           |
| Longest full-time job (mean rank) | 54.7             | 51.3           |
| No. dependent children (mean)     | 1.33             | 1.15           |

|                                                       |        |         |
|-------------------------------------------------------|--------|---------|
| Lifetime months treated in psych hospital (mean rank) | 59.15  | 54.89   |
| Psychiatric Diagnosis                                 |        |         |
| Psychotic disorder                                    | 13     | 17      |
| All other Psychiatric disorders                       | 44     | 44      |
| Monthly income (USD)                                  | 929.69 | 1230.21 |

\*  $p \leq .05$ , \*\*  $p \leq .01$

Figure 1: Flow Chart of Financial Capability Algorithm

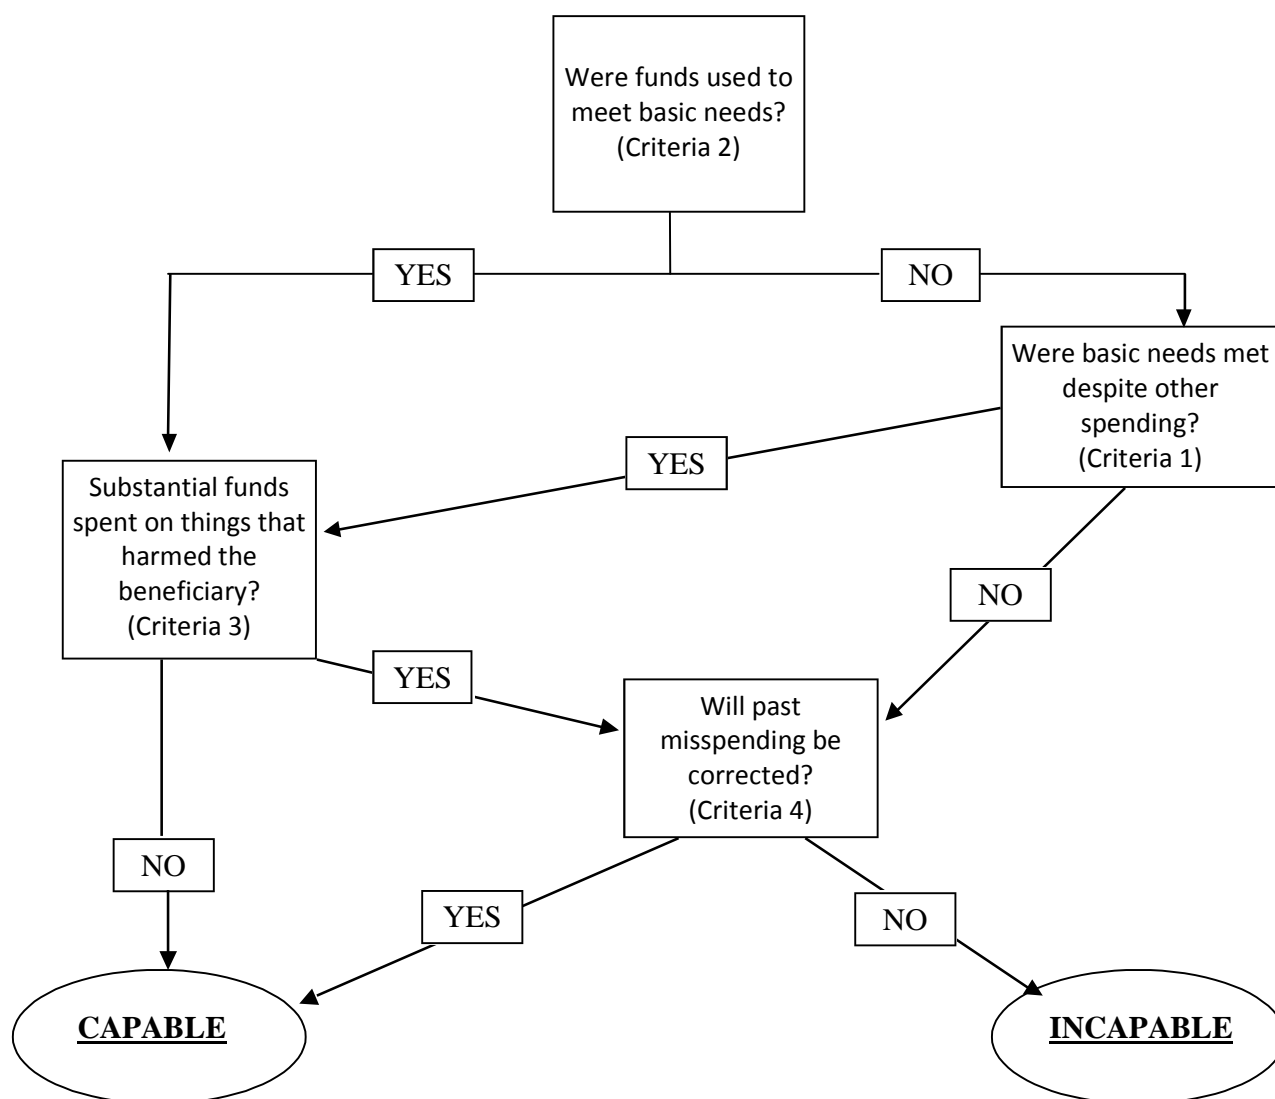

Supplement: appi.ps.201400036.ds001.pdf [file appi.ps.201400036.ds001.pdf]
